# Supplementary material for: Associations between grain intake and hospitalized nephrolithiasis in Chinese adults: a case-control study
Source: Royal Society of Chemistry journal article supplement (doi:10.1039/d2fo03978h), 2023-01-01
Supplement: d2fo03978h1.pdf [file d2fo03978h1.pdf]

**Supplementary table 1** Associations between whole grain intake and nephrolithiasis by sex including participants with extreme total energy intake

|                                           | Categories of whole grains intake |                                |                          | <i>P</i> for trend <sup>a</sup> |
|-------------------------------------------|-----------------------------------|--------------------------------|--------------------------|---------------------------------|
|                                           | Level 1                           | Level 2                        | Level 3                  |                                 |
| All participants ( <i>n</i> = 741)        |                                   |                                |                          |                                 |
| Intake of whole grains (range, g/1000kal) | 0, 4.174                          | 4.183, 12.609                  | 12.657, 212.656          |                                 |
| Crude model                               | 1.00 (reference)                  | 0.61 (0.42, 0.87) <sup>b</sup> | 0.32 (0.21, 0.48)        | < 0.001                         |
| Model 2                                   | 1.00 (reference)                  | 0.56 (0.38, 0.81)              | 0.32 (0.21, 0.48)        | < 0.001                         |
| Model 3                                   | 1.00 (reference)                  | <b>0.66 (0.35, 0.97)</b>       | <b>0.57 (0.27, 0.82)</b> | <b>0.017</b>                    |
| Men ( <i>n</i> = 498)                     |                                   |                                |                          |                                 |
| Intake of whole grains (range, g/1000kal) | 0, 3.822                          | 3.837, 11.831                  | 11.855, 212.656          |                                 |
| Crude model                               | 1.00 (reference)                  | 0.73 (0.47, 1.13)              | 0.20 (0.11, 0.35)        | < 0.001                         |
| Model 2                                   | 1.00 (reference)                  | 0.65 (0.41, 1.05)              | 0.20 (0.11, 0.35)        | < 0.001                         |
| Model 3                                   | 1.00 (reference)                  | <b>0.88 (0.37, 0.99)</b>       | <b>0.70 (0.40, 0.87)</b> | <b>0.020</b>                    |
| Women ( <i>n</i> = 243)                   |                                   |                                |                          |                                 |
| Intake of whole grains (range, g/1000kal) | 0, 5.027                          | 5.035, 14.077                  | 14.176, 96.376           |                                 |
| Crude model                               | 1.00 (reference)                  | 0.55 (0.29, 1.05)              | 0.55 (0.28, 1.08)        | 0.138                           |
| Model 2                                   | 1.00 (reference)                  | 0.49 (0.25, 0.96)              | 0.56 (0.27, 1.14)        | 0.183                           |
| Model 3                                   | 1.00 (reference)                  | <b>0.46 (0.20, 0.89)</b>       | <b>0.50 (0.25, 0.81)</b> | <b>0.045</b>                    |

<sup>a</sup> Multivariate conditional logistic regression <sup>b</sup> Odds ratio (95% confidence interval) (all such values)

Model 2 adjusted for age, sex, and BMI

Model 3 adjusted for age, sex, BMI, income, educational level, smoking status, drinking status, water drinking per day, and total energy, protein, fat, coffee, tea, beverages, and calcium intake.

**Supplementary table 2** Associations between refined grain intake and nephrolithiasis by sex including participants with extreme total energy intake

|  | Categories of refined grains intake |  |  | <i>P</i> for trend <sup>a</sup> |
|--|-------------------------------------|--|--|---------------------------------|
|--|-------------------------------------|--|--|---------------------------------|

|                                             | Level 1          | Level 2                        | Level 3                   |                  |
|---------------------------------------------|------------------|--------------------------------|---------------------------|------------------|
| All participants ( <i>n</i> = 741)          |                  |                                |                           |                  |
| Intake of refined grains (range, g/1000kal) | 0, 286.706       | 286.770, 414.630               | 414.940, 903.362          |                  |
| Crude model                                 | 1.00 (reference) | 3.09 (1.88, 5.06) <sup>b</sup> | 9.24 (5.74, 14.87)        | < 0.001          |
| Model 2                                     | 1.00 (reference) | 3.09 (1.84, 5.17)              | 8.98 (5.46, 14.77)        | < 0.001          |
| Model 3                                     | 1.00 (reference) | <b>3.63 (1.59, 8.30)</b>       | <b>3.42 (1.42, 8.20)</b>  | <b>0.006</b>     |
| Men ( <i>n</i> = 498)                       |                  |                                |                           |                  |
| Intake of refined grains (range, g/1000kal) | 0, 286.771       | 288.566, 406.800               | 407.330, 874.591          |                  |
| Crude model                                 | 1.00 (reference) | 3.28 (1.77, 6.08)              | 9.38 (5.23, 16.82)        | < 0.001          |
| Model 2                                     | 1.00 (reference) | 3.29 (1.73, 6.26)              | 9.22 (5.01, 16.98)        | < 0.001          |
| Model 3                                     | 1.00 (reference) | <b>3.55 (1.22, 10.33)</b>      | <b>4.29 (1.44, 12.74)</b> | <b>&lt;0.010</b> |
| Women( <i>n</i> = 243)                      |                  |                                |                           |                  |
| Intake of refined grains (range, g/1000kal) | 8.565, 284.437   | 284.895, 424.273               | 424.410, 903.362          |                  |
| Crude model                                 | 1.00 (reference) | 2.73 (1.14, 6.51)              | 11.90 (4.90, 28.90)       | < 0.001          |
| Model 2                                     | 1.00 (reference) | 2.90 (1.16, 7.23)              | 11.09 (4.40, 28.00)       | < 0.001          |
| Model 3                                     | 1.00 (reference) | 5.43 (1.63, 16.92)             | 3.17 (1.22, 15.97)        | 0.033            |

<sup>a</sup> Multivariate conditional logistic regression <sup>b</sup> Odds ratio (95% confidence interval) (all such values)

Model 2 adjusted for age, sex, and BMI

Model 3 adjusted for age, sex, BMI, income, educational level, smoking status, drinking status, water drinking per day, and total energy, protein, fat, coffee, tea, beverages, and calcium intake.

**Supplementary table 3** Associations between whole grain intake and nephrolithiasis by sex excluding participants with extreme grain intake

|                                           | Categories of whole grains intake |                                |                          | <i>P</i> for trend <sup>a</sup> |
|-------------------------------------------|-----------------------------------|--------------------------------|--------------------------|---------------------------------|
|                                           | Level 1                           | Level 2                        | Level 3                  |                                 |
| All participants ( <i>n</i> = 634)        |                                   |                                |                          |                                 |
| Intake of whole grains (range, g/1000kal) | 0, 3.978                          | 3.990, 12.508                  | 12.564, 128.191          |                                 |
| Crude model                               | 1.00 (reference)                  | 0.63 (0.42, 0.94) <sup>b</sup> | 0.33 (0.21, 0.52)        | < 0.001                         |
| Model 2                                   | 1.00 (reference)                  | 0.56 (0.37, 0.86)              | 0.32 (0.20, 0.51)        | < 0.001                         |
| Model 3                                   | 1.00 (reference)                  | <b>0.69 (0.33, 0.97)</b>       | <b>0.53 (0.22, 0.86)</b> | <b>0.015</b>                    |
| Men ( <i>n</i> = 433)                     |                                   |                                |                          |                                 |
| Intake of whole grains (range, g/1000kal) | 0, 3.745                          | 3.788, 11.648                  | 11.697, 128.191          |                                 |
| Crude model                               | 1.00 (reference)                  | 0.97 (0.59, 1.58)              | 0.23 (0.13, 0.42)        | < 0.001                         |
| Model 2                                   | 1.00 (reference)                  | 0.84 (0.50, 1.41)              | 0.22 (0.12, 0.41)        | < 0.001                         |
| Model 3                                   | 1.00 (reference)                  | <b>0.73 (0.42, 0.94)</b>       | <b>0.70 (0.49, 0.97)</b> | <b>0.033</b>                    |
| Women ( <i>n</i> = 201)                   |                                   |                                |                          |                                 |
| Intake of whole grains (range, g/1000kal) | 0, 4.941                          | 5.027, 14.077                  | 14.176, 77.384           |                                 |
| Crude model                               | 1.00 (reference)                  | 0.40 (0.19, 0.83)              | 0.49 (0.22, 1.07)        | 0.165                           |
| Model 2                                   | 1.00 (reference)                  | 0.32 (0.15, 0.71)              | 0.49 (0.22, 1.12)        | 0.216                           |
| Model 3                                   | 1.00 (reference)                  | <b>0.42 (0.21, 0.88)</b>       | <b>0.48 (0.20, 0.83)</b> | <b>0.033</b>                    |

<sup>a</sup> Multivariate conditional logistic regression

<sup>b</sup> Odds ratio (95% confidence interval) (all such values)

Model 2 adjusted for age, sex, and BMI

Model 3 adjusted for age, sex, BMI, income, educational level, smoking status, drinking status, water drinking per day, and total energy, protein, fat, coffee, tea, beverages, and calcium intake.

**Supplementary table 4** Associations between refined grain intake and nephrolithiasis by sex excluding participants with extreme grain intake

|                                             | Categories of refined grains intake |                                |                           | <i>P</i> for trend <sup>a</sup> |
|---------------------------------------------|-------------------------------------|--------------------------------|---------------------------|---------------------------------|
|                                             | Level 1                             | Level 2                        | Level 3                   |                                 |
| All participants ( <i>n</i> = 634)          |                                     |                                |                           |                                 |
| Intake of refined grains (range, g/1000kal) | 112.550, 291.233                    | 291.311, 413.746               | 413.867, 903.362          |                                 |
| Crude model                                 | 1.00 (reference)                    | 3.16 (1.84, 5.43) <sup>b</sup> | 8.55 (5.09, 14.37)        | < 0.001                         |
| Model 2                                     | 1.00 (reference)                    | 3.01 (1.72, 5.28)              | 7.90 (4.63, 13.48)        | < 0.001                         |
| Model 3                                     | 1.00 (reference)                    | <b>2.90 (1.17, 7.14)</b>       | <b>3.42 (1.30, 9.07)</b>  | <b>0.014</b>                    |
| Men ( <i>n</i> = 433)                       |                                     |                                |                           |                                 |
| Intake of refined grains (range, g/1000kal) | 112.550, 292.084                    | 292.685, 402.715               | 403.300, 874.591          |                                 |
| Crude model                                 | 1.00 (reference)                    | 3.33 (1.71, 6.48)              | 8.55 (4.61, 15.86)        | < 0.001                         |
| Model 2                                     | 1.00 (reference)                    | 3.30 (1.65, 6.57)              | 7.99 (4.24, 15.07)        | < 0.001                         |
| Model 3                                     | 1.00 (reference)                    | <b>2.59 (1.79, 8.50)</b>       | <b>3.87 (1.23, 12.17)</b> | <b>0.024</b>                    |
| Women ( <i>n</i> = 201)                     |                                     |                                |                           |                                 |
| Intake of refined grains (range, g/1000kal) | 123.007, 284.895                    | 288.169, 423.493               | 424.410, 903.362          |                                 |
| Crude model                                 | 1.00 (reference)                    | 2.11 (0.85, 5.28)              | 8.14 (3.26, 20.335)       | < 0.001                         |
| Model 2                                     | 1.00 (reference)                    | 2.11 (0.81, 5.50)              | 7.10 (2.76, 18.24)        | < 0.001                         |
| Model 3                                     | 1.00 (reference)                    | <b>2.09 (1.07, 18.84)</b>      | <b>2.97 (1.10, 19.42)</b> | <b>0.048</b>                    |

<sup>a</sup> Multivariate conditional logistic regression

<sup>b</sup> Odds ratio (95% confidence interval) (all such values)

Model 2 adjusted for age, sex, and BMI

Model 3 adjusted for age, sex, BMI, income, educational level, smoking status, drinking status, water drinking per day, and total energy, protein, fat, coffee, tea, beverages, and calcium intake.
